# Supplementary material for: Mlf mediates proteotoxic response via formation of cellular foci for protein folding and degradation in Giardia
Source: PubMed Central journal article supplement (PMC11527388; doi:10.1371/journal.ppat.1012617), 2024-10-21

A

Tree scale: 1

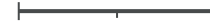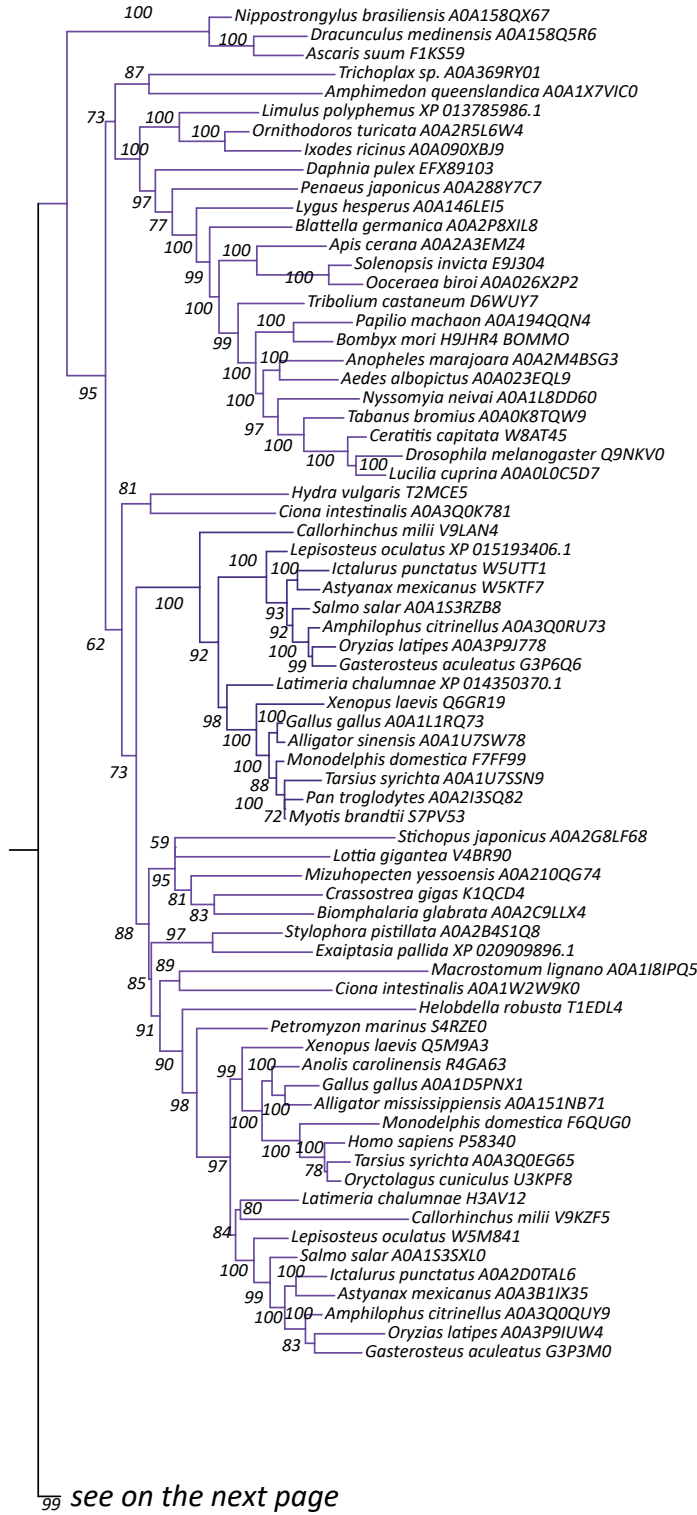

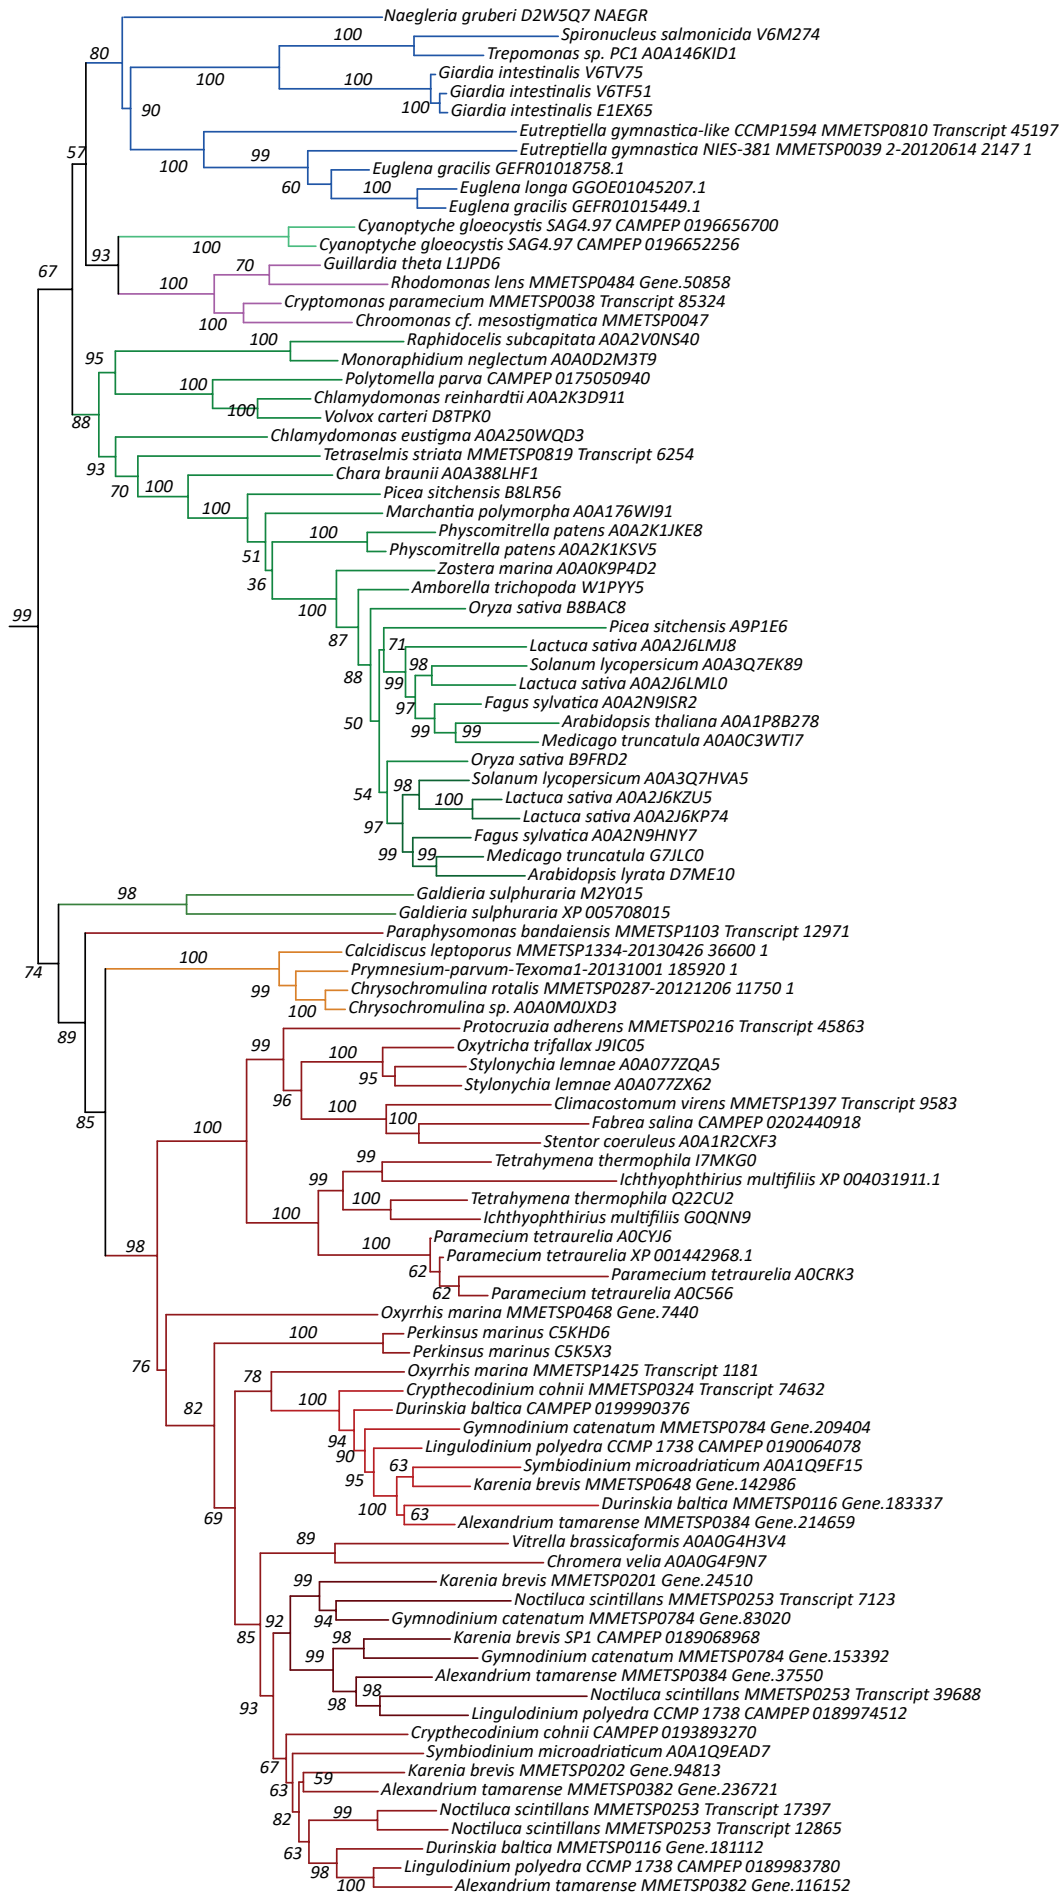

B

secondary structure

*Giardia intestinalis*  
*Homo sapiens*  
*Arabidopsis thaliana*  
*Guillardia theta*  
*Perkinsus marinus*  
*Paramecium tetraurelia*  
*Polysphondylium pallidum*  
*Chrysochromulina tobinii*  
*Naegleria gruberi*

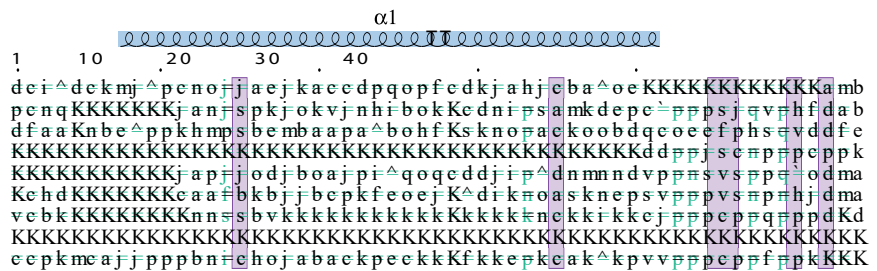

*Giardia intestinalis*  
*Homo sapiens*  
*Arabidopsis thaliana*  
*Guillardia theta*  
*Perkinsus marinus*  
*Paramecium tetraurelia*  
*Polysphondylium pallidum*  
*Chrysochromulina tobinii*  
*Naegleria gruberi*

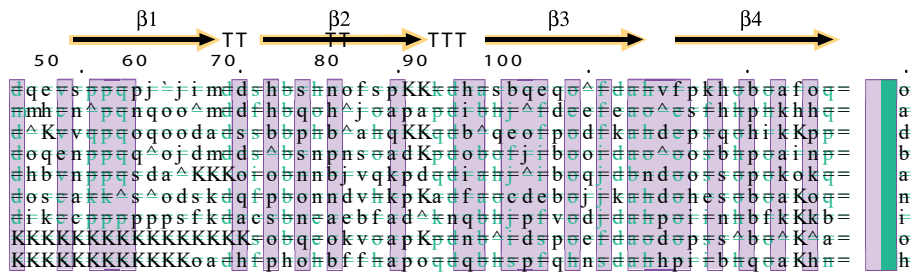

*Giardia intestinalis*  
*Homo sapiens*  
*Arabidopsis thaliana*  
*Guillardia theta*  
*Perkinsus marinus*  
*Paramecium tetraurelia*  
*Polysphondylium pallidum*  
*Chrysochromulina tobinii*  
*Naegleria gruberi*

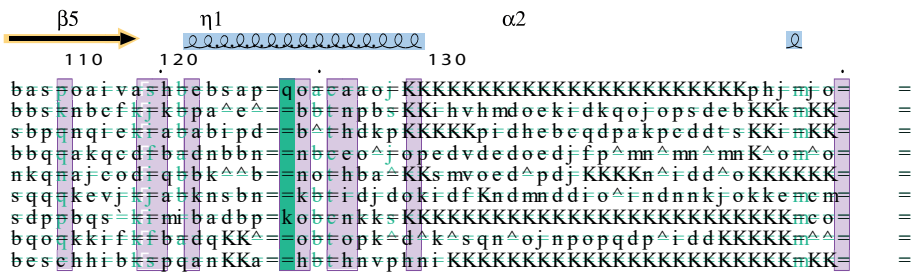

Supplement: ppat.1012617.s001.pdf [file ppat.1012617.s001.pdf]
