# Supplementary material for: Mlf mediates proteotoxic response via formation of cellular foci for protein folding and degradation in Giardia
Source: PubMed Central journal article supplement (PMC11527388; doi:10.1371/journal.ppat.1012617), 2024-10-21

**A**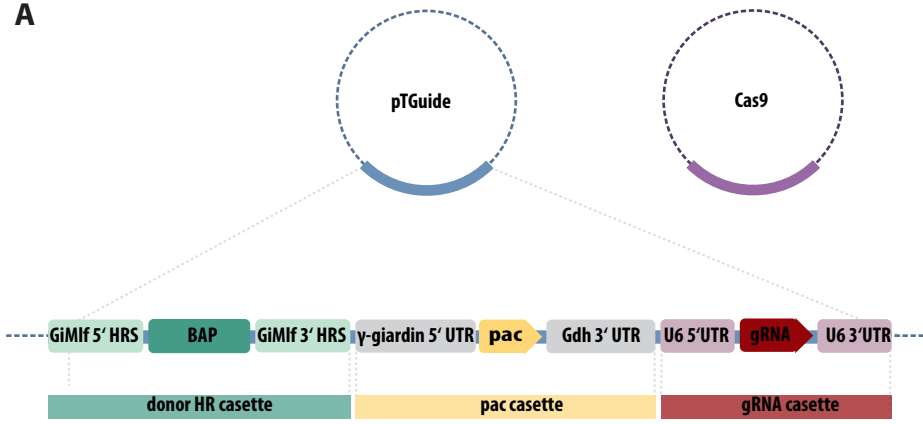**B**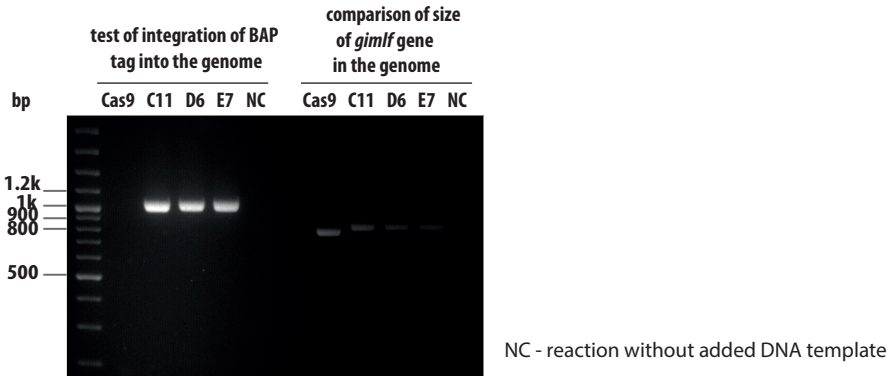**test of integration of BAP tag into the genome**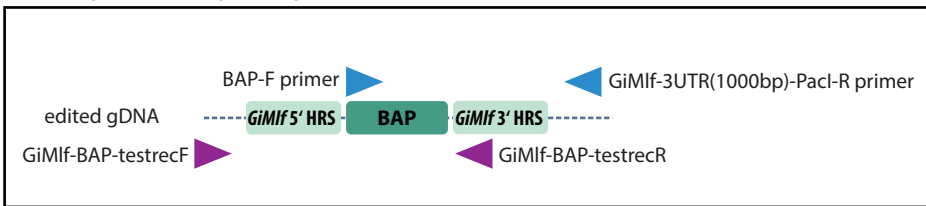**comparison of size of *gimif* in the genome**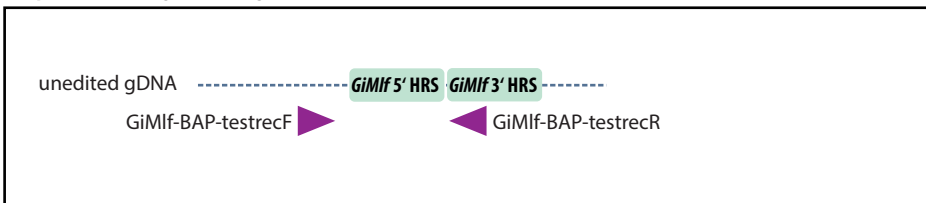**C**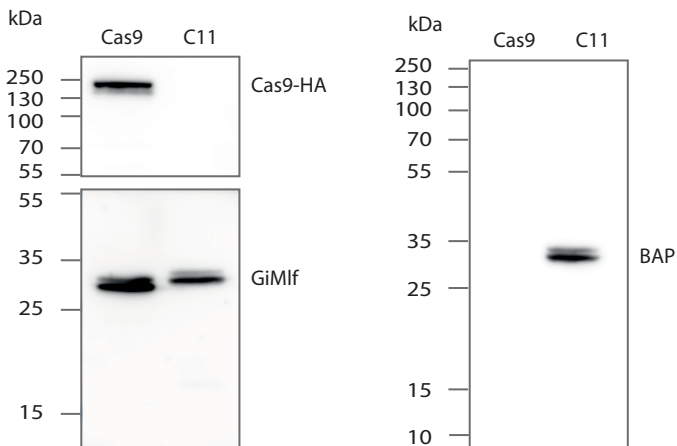

Supplement: ppat.1012617.s002.pdf [file ppat.1012617.s002.pdf]
