# Supplementary material for: Mlf mediates proteotoxic response via formation of cellular foci for protein folding and degradation in Giardia
Source: PubMed Central journal article supplement (PMC11527388; doi:10.1371/journal.ppat.1012617), 2024-10-21

**A**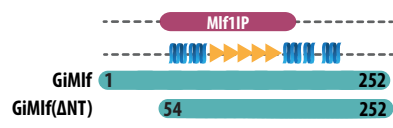**B**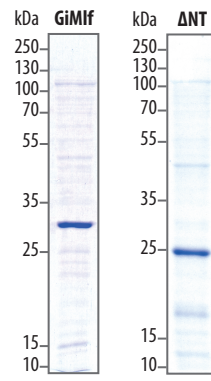**C**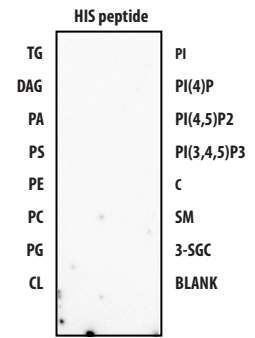

Supplement: ppat.1012617.s005.pdf [file ppat.1012617.s005.pdf]
